# Supplementary material
Source: PubMed Central journal article supplement (PMC10561893)
Supplement: gbad087_suppl_supplementary_tables.pdf [file gbad087_suppl_supplementary_tables.pdf]

| Regression Paths                       | Mortality |       |         |       |         |       |                |       |         |       |         |       | Mortality before 2020 |       |         |       |
|----------------------------------------|-----------|-------|---------|-------|---------|-------|----------------|-------|---------|-------|---------|-------|-----------------------|-------|---------|-------|
|                                        | Mortality |       |         |       |         |       | Multimorbidity |       |         |       |         |       | SIC                   |       | 2020    |       |
|                                        | $\beta$   | p     | $\beta$ | p     | $\beta$ | p     | $\beta$        | p     | $\beta$ | p     | $\beta$ | p     | $\beta$               | p     | $\beta$ | p     |
| Dependent variable: Health Outcome     |           |       |         |       |         |       |                |       |         |       |         |       |                       |       |         |       |
| % CD4+ naïve                           | -0.218    | 0.000 | -0.233  | 0.000 | -0.235  | 0.000 | -0.115         | 0.062 | -0.090  | 0.000 | -0.081  | 0.000 | -0.447                | 0.000 | -0.240  | 0.000 |
| % CD8+ naïve                           | -0.212    | 0.000 | -0.229  | 0.000 | -0.224  | 0.000 | -0.129         | 0.000 | -0.004  | 0.841 | -0.048  | 0.000 | -0.453                | 0.000 | -0.215  | 0.000 |
| Chronic Stress                         | 0.225     | 0.000 | 0.111   | 0.000 | 0.219   | 0.000 | 0.262          | 0.000 | 0.224   | 0.000 | 0.219   | 0.000 | 0.140                 | 0.000 | 0.272   | 0.000 |
| CMV Seropositivity                     | -0.133    | 0.000 | -0.141  | 0.000 | -0.138  | 0.000 | -0.108         | 0.000 | -0.023  | 0.369 | -0.044  | 0.040 | -0.269                | 0.000 | -0.168  | 0.000 |
| Chronic Stress X CMV                   | -0.130    | 0.002 |         |       | -0.134  | 0.008 | -0.006         | 0.795 |         |       | 0.008   | 0.710 | -0.045                | 0.063 | -0.179  | 0.006 |
| Age                                    | 0.418     | 0.000 | 0.424   | 0.000 | 0.425   | 0.000 | 0.280          | 0.000 | 0.366   | 0.000 | 0.352   | 0.000 | 0.635                 | 0.000 | 0.435   | 0.000 |
| Black, not Hispanic                    | 0.059     | 0.002 | 0.056   | 0.016 | 0.053   | 0.019 | 0.109          | 0.000 | 0.063   | 0.000 | 0.075   | 0.000 | 0.056                 | 0.000 | 0.047   | 0.049 |
| Hispanic                               | -0.084    | 0.000 | -0.074  | 0.002 | -0.076  | 0.001 | -0.003         | 0.822 | -0.010  | 0.431 | -0.007  | 0.565 | -0.001                | 0.917 | -0.087  | 0.001 |
| Other Race, not Hispanic               | 0.019     | 0.372 | 0.017   | 0.521 | 0.017   | 0.507 | 0.031          | 0.013 | 0.020   | 0.117 | 0.022   | 0.075 | 0.033                 | 0.002 | -0.004  | 0.906 |
| Gender: Female                         | 0.031     | 0.051 | 0.031   | 0.152 | 0.029   | 0.182 | 0.033          | 0.005 | 0.007   | 0.598 | 0.018   | 0.103 | 0.134                 | 0.000 | 0.032   | 0.147 |
| 0-11 Years Education                   | 0.126     | 0.000 | 0.106   | 0.000 | 0.109   | 0.000 | 0.122          | 0.000 | 0.096   | 0.000 | 0.096   | 0.000 | 0.007                 | 0.664 | 0.109   | 0.000 |
| 12 Years Education                     | 0.066     | 0.003 | 0.061   | 0.031 | 0.059   | 0.027 | 0.104          | 0.000 | 0.076   | 0.000 | 0.075   | 0.000 | -0.016                | 0.130 | 0.046   | 0.114 |
| 13-15 Years Education                  | 0.026     | 0.136 | 0.020   | 0.359 | 0.019   | 0.368 | 0.072          | 0.000 | 0.045   | 0.000 | 0.044   | 0.000 | -0.009                | 0.454 | 0.012   | 0.619 |
| Under Weight                           |           |       | 0.017   | 0.317 | 0.019   | 0.247 |                |       | -0.001  | 0.971 | -0.002  | 0.898 | -0.020                | 0.040 | 0.030   | 0.120 |
| Overweight                             |           |       | -0.111  | 0.000 | -0.113  | 0.000 |                |       | 0.091   | 0.000 | 0.091   | 0.000 | 0.004                 | 0.757 | -0.097  | 0.000 |
| Obese I                                |           |       | -0.059  | 0.016 | -0.057  | 0.018 |                |       | 0.196   | 0.000 | 0.195   | 0.000 | 0.033                 | 0.027 | -0.030  | 0.248 |
| Obese II                               |           |       | -0.017  | 0.465 | -0.019  | 0.411 |                |       | 0.237   | 0.000 | 0.236   | 0.000 | 0.028                 | 0.008 | -0.042  | 0.085 |
| Current Smoker                         |           |       | 0.089   | 0.001 | 0.090   | 0.000 |                |       | 0.066   | 0.000 | 0.065   | 0.000 | 0.397                 | 0.000 | 0.109   | 0.000 |
| Past Smoker                            |           |       | 0.046   | 0.030 | 0.045   | 0.030 |                |       | 0.080   | 0.000 | 0.079   | 0.000 | 0.350                 | 0.000 | 0.064   | 0.011 |
| Dependent variable: % CD4+ naïve       |           |       |         |       |         |       |                |       |         |       |         |       |                       |       |         |       |
| Chronic Stress                         | 0.007     | 0.745 | -0.025  | 0.186 | 0.022   | 0.403 | 0.007          | 0.786 | -0.025  | 0.186 | 0.021   | 0.423 | 0.022                 | 0.395 | 0.022   | 0.410 |
| CMV Seropositivity                     | -0.242    | 0.000 | -0.240  | 0.000 | -0.241  | 0.000 |                |       | -0.240  | 0.000 | -0.241  | 0.000 | -0.241                | 0.000 | -0.241  | 0.000 |
| Chronic Stress X CMV                   | -0.056    | 0.016 |         |       | -0.057  | 0.033 |                |       | -0.056  | 0.033 | -0.057  | 0.039 | -0.057                | 0.031 | -0.057  | 0.035 |
| Age                                    | -0.001    | 0.959 | -0.020  | 0.155 | -0.021  | 0.118 | -0.001         | 0.963 | -0.020  | 0.155 | -0.022  | 0.125 | -0.021                | 0.112 | -0.021  | 0.121 |
| Black, not Hispanic                    | -0.108    | 0.000 | -0.100  | 0.000 | -0.099  | 0.000 | -0.108         | 0.000 | -0.100  | 0.000 | -0.099  | 0.000 | -0.099                | 0.000 | -0.099  | 0.000 |
| Hispanic                               | -0.038    | 0.002 | -0.038  | 0.010 | -0.039  | 0.009 | -0.038         | 0.005 | -0.038  | 0.010 | -0.039  | 0.010 | -0.039                | 0.008 | -0.039  | 0.010 |
| Other Race, not Hispanic               | 0.004     | 0.588 | 0.005   | 0.590 | 0.006   | 0.543 | 0.004          | 0.637 | 0.005   | 0.591 | 0.006   | 0.562 | 0.006                 | 0.538 | 0.006   | 0.553 |
| Gender: Female                         | 0.173     | 0.000 | 0.171   | 0.000 | 0.171   | 0.000 | 0.172          | 0.000 | 0.171   | 0.000 | 0.171   | 0.000 | 0.171                 | 0.000 | 0.171   | 0.000 |
| 0-11 Years Education                   | -0.075    | 0.000 | -0.062  | 0.001 | -0.061  | 0.001 | -0.075         | 0.000 | -0.062  | 0.001 | -0.061  | 0.001 | -0.061                | 0.001 | -0.061  | 0.001 |
| 12 Years Education                     | -0.085    | 0.000 | -0.069  | 0.000 | -0.070  | 0.000 | -0.085         | 0.000 | -0.069  | 0.000 | -0.070  | 0.000 | -0.070                | 0.000 | -0.070  | 0.000 |
| 13-15 Years Education                  | -0.043    | 0.001 | -0.030  | 0.075 | -0.031  | 0.062 | -0.043         | 0.005 | -0.030  | 0.075 | -0.031  | 0.068 | -0.031                | 0.056 | -0.031  | 0.066 |
| Under Weight                           |           |       | -0.024  | 0.111 | -0.023  | 0.112 | -0.242         | 0.000 | -0.024  | 0.111 | -0.023  | 0.117 | -0.023                | 0.099 | -0.023  | 0.114 |
| Overweight                             |           |       | -0.037  | 0.017 | -0.037  | 0.013 |                |       | -0.037  | 0.017 | -0.037  | 0.015 | -0.037                | 0.010 | -0.037  | 0.014 |
| Obese I                                |           |       | -0.064  | 0.000 | -0.063  | 0.000 |                |       | -0.064  | 0.000 | -0.063  | 0.000 | -0.063                | 0.000 | -0.063  | 0.000 |
| Obese II                               |           |       | -0.115  | 0.000 | -0.115  | 0.000 |                |       | -0.115  | 0.000 | -0.115  | 0.000 | -0.115                | 0.000 | -0.115  | 0.000 |
| Current Smoker                         |           |       | -0.038  | 0.004 | -0.038  | 0.004 |                |       | -0.038  | 0.004 | -0.038  | 0.004 | -0.038                | 0.003 | -0.038  | 0.003 |
| Past Smoker                            |           |       | 0.005   | 0.749 | 0.005   | 0.754 |                |       | 0.005   | 0.750 | 0.005   | 0.760 | 0.005                 | 0.750 | 0.005   | 0.757 |
| Dependent variable: % CD8+ naïve       |           |       |         |       |         |       |                |       |         |       |         |       |                       |       |         |       |
| Chronic Stress                         | 0.069     | 0.003 | 0.019   | 0.221 | 0.074   | 0.007 | 0.098          | 0.006 | 0.019   | 0.219 | 0.100   | 0.003 | 0.068                 | 0.003 | 0.075   | 0.009 |
| CMV Seropositivity                     | -0.414    | 0.000 | -0.423  | 0.000 | -0.400  | 0.000 |                |       | -0.423  | 0.000 | -0.534  | 0.000 | -0.365                | 0.000 | -0.404  | 0.000 |
| Chronic Stress X CMV                   | -0.072    | 0.003 |         |       | -0.071  | 0.012 |                |       | -0.102  | 0.005 | -0.094  | 0.005 | -0.064                | 0.006 | -0.071  | 0.014 |
| Age                                    | -0.258    | 0.000 | -0.269  | 0.000 | -0.255  | 0.000 | -0.368         | 0.000 | -0.269  | 0.000 | -0.340  | 0.000 | -0.233                | 0.000 | -0.258  | 0.000 |
| Black, not Hispanic                    | 0.193     | 0.000 | 0.200   | 0.000 | 0.189   | 0.000 | 0.274          | 0.000 | 0.200   | 0.000 | 0.253   | 0.000 | 0.173                 | 0.000 | 0.191   | 0.000 |
| Hispanic                               | 0.038     | 0.001 | 0.039   | 0.002 | 0.036   | 0.005 | 0.054          | 0.001 | 0.039   | 0.002 | 0.047   | 0.001 | 0.032                 | 0.001 | 0.036   | 0.006 |
| Other Race, not Hispanic               | 0.048     | 0.000 | 0.048   | 0.001 | 0.046   | 0.002 | 0.068          | 0.000 | 0.048   | 0.001 | 0.062   | 0.001 | 0.042                 | 0.001 | 0.047   | 0.002 |
| Gender: Female                         | 0.232     | 0.000 | 0.237   | 0.000 | 0.224   | 0.000 | 0.331          | 0.000 | 0.237   | 0.000 | 0.298   | 0.000 | 0.204                 | 0.000 | 0.226   | 0.000 |
| 0-11 Years Education                   | -0.023    | 0.058 | -0.019  | 0.214 | -0.016  | 0.274 | -0.032         | 0.075 | -0.019  | 0.213 | -0.022  | 0.226 | -0.015                | 0.230 | -0.016  | 0.282 |
| 12 Years Education                     | -0.033    | 0.011 | -0.027  | 0.090 | -0.026  | 0.095 | -0.047         | 0.018 | -0.027  | 0.090 | -0.035  | 0.068 | -0.024                | 0.068 | -0.026  | 0.102 |
| 13-15 Years Education                  | -0.021    | 0.134 | -0.016  | 0.363 | -0.015  | 0.358 | -0.03          | 0.164 | -0.016  | 0.362 | -0.020  | 0.313 | -0.014                | 0.319 | -0.015  | 0.369 |
| Under Weight                           |           |       | -0.024  | 0.051 | -0.022  | 0.066 | -0.59          | 0.000 | -0.024  | 0.051 | -0.030  | 0.045 | -0.020                | 0.046 | -0.022  | 0.069 |
| Overweight                             |           |       | -0.008  | 0.619 | -0.009  | 0.609 |                |       | -0.008  | 0.617 | -0.012  | 0.560 | -0.008                | 0.571 | -0.009  | 0.614 |
| Obese I                                |           |       | -0.015  | 0.375 | -0.013  | 0.436 |                |       | -0.015  | 0.376 | -0.017  | 0.374 | -0.012                | 0.388 | -0.013  | 0.443 |
| Obese II                               |           |       | -0.030  | 0.030 | -0.029  | 0.041 |                |       | -0.030  | 0.030 | -0.039  | 0.018 | -0.026                | 0.023 | -0.029  | 0.045 |
| Current Smoker                         |           |       | -0.025  | 0.086 | -0.023  | 0.107 |                |       | -0.025  | 0.086 | -0.030  | 0.072 | -0.021                | 0.085 | -0.023  | 0.113 |
| Past Smoker                            |           |       | -0.014  | 0.234 | -0.014  | 0.246 |                |       | -0.014  | 0.234 | -0.018  | 0.194 | -0.012                | 0.207 | -0.014  | 0.251 |
| Dependent variable: CMV Seropositivity |           |       |         |       |         |       |                |       |         |       |         |       |                       |       |         |       |
| Age                                    | 0.191     | 0.000 | 0.198   | 0.000 | 0.198   | 0.000 | 0.191          | 0.000 | 0.198   | 0.000 | 0.198   | 0.000 | 0.198                 | 0.000 | 0.198   | 0.000 |
| Black, not Hispanic                    | 0.243     | 0.000 | 0.239   | 0.000 | 0.239   | 0.000 | 0.243          | 0.000 | 0.239   | 0.000 | 0.239   | 0.000 | 0.239                 | 0.000 | 0.239   | 0.000 |
| Hispanic                               | 0.259     | 0.000 | 0.260   | 0.000 | 0.260   | 0.000 | 0.259          | 0.000 | 0.260   | 0.000 | 0.260   | 0.000 | 0.260                 | 0.000 | 0.260   | 0.000 |
| Other Race, not Hispanic               | 0.128     | 0.000 | 0.128   | 0.000 | 0.128   | 0.000 | 0.128          | 0.000 | 0.128   | 0.000 | 0.128   | 0.000 | 0.128                 | 0.000 | 0.128   | 0.000 |
| Gender: Female                         | 0.120     | 0.000 | 0.117   | 0.000 | 0.117   | 0.000 | 0.120          | 0.000 | 0.117   | 0.000 | 0.117   | 0.000 | 0.117                 | 0.000 | 0.117   | 0.000 |
| 0-11 Years Education                   | 0.166     | 0.000 | 0.160   | 0.000 | 0.160   | 0.000 | 0.166          | 0.000 | 0.160   | 0.000 | 0.160   | 0.000 | 0.160                 | 0.000 | 0.160   | 0.000 |
| 12 Years Education                     | 0.087     | 0.000 | 0.083   | 0.000 | 0.083   | 0.000 | 0.087          | 0.000 | 0.083   | 0.000 | 0.083   | 0.000 | 0.083                 | 0.000 | 0.083   | 0.000 |
| 13-15 Years Education                  | 0.051     | 0.001 | 0.048   | 0.013 | 0.048   | 0.011 | 0.051          | 0.003 | 0.048   | 0.013 | 0.048   | 0.013 | 0.048                 | 0.010 | 0.048   | 0.012 |
| Under Weight                           |           |       | 0.010   | 0.539 | 0.010   | 0.526 |                |       | 0.010   | 0.537 | 0.010   | 0.536 | 0.011                 | 0.511 | 0.010   | 0.536 |
| Overweight                             |           |       | -0.004  | 0.842 | -0.004  | 0.838 |                |       | -0.004  | 0.840 | -0.004  | 0.839 | -0.004                | 0.833 | -0.004  | 0.839 |
| Obese I                                |           |       | -0.007  | 0.736 | -0.007  | 0.732 |                |       | -0.007  | 0.739 | -0.007  | 0.734 | -0.008                | 0.722 | -0.007  | 0.733 |
| Obese II                               |           |       | 0.005   | 0.833 | 0.004   | 0.833 |                |       | 0.005   | 0.832 | 0.004   | 0.838 | 0.005                 | 0.829 | 0.005   | 0.834 |
| Current Smoker                         |           |       | 0.033   | 0.142 | 0.033   | 0.135 |                |       |         |       |         |       |                       |       |         |       |
